## **Warming in the land of the midnight sun: breeding birds may suffer greater heat stress at high- vs low-Arctic sites**

Ryan S. O'Connor<sup>1,2,3,4\*</sup>, Audrey Le Pogam<sup>1,2,3,4</sup>, Kevin G. Young<sup>5</sup>, Oliver P. Love<sup>6</sup>, Christopher J. Cox<sup>7</sup>, Gabrielle Roy<sup>1</sup>, Francis Robitaille<sup>1</sup>, Kyle H. Elliott<sup>8</sup>, Anna L. Hargreaves<sup>9</sup>, Emily S. Choy<sup>8</sup>, H. Grant Gilchrist<sup>10</sup>, Dominique Berteaux<sup>1,2,3,4</sup>, Andrew Tam<sup>11</sup>, François Vézina<sup>1,2,3,4</sup>

<sup>1</sup> Département de Biologie, Chimie et Géographie, Université du Québec à Rimouski, Rimouski, QC, G5L 3A1, Canada

<sup>2</sup> Groupe de recherche sur les environnements nordiques BORÉAS

<sup>3</sup> Centre d'études nordiques

<sup>4</sup> Centre de la science de la biodiversité du Québec

<sup>5</sup> Department of Biology, Advanced Facility for Avian Research, Western University, London, ON, N6A 5B7, Canada

<sup>6</sup> Department of Integrative Biology, University of Windsor, Windsor, ON, N9B 3P4, Canada

<sup>7</sup> Physical Sciences Laboratory, National Oceanic and Atmospheric Administration, Boulder, CO, 80305, USA

<sup>8</sup> Department of Natural Resource Sciences, McGill University, Ste. Anne de Bellevue, QC, H9X 3V9, Canada

<sup>9</sup> Department of Biological Sciences, McGill University, Montreal, QC, H3A 1B1, Canada

<sup>10</sup> National Wildlife Research Centre, Environment and Climate Change Canada, Ottawa, ON, K1S 5B6, Canada

<sup>11</sup> Department of National Defence, 8 Wing Trenton, Astra, ON, K0K3W0, Canada

\* Corresponding author: Ryan S. O'Connor, Département de biologie, chimie et géographie,  
Université du Québec à Rimouski, Rimouski, QC, G5L 3A1, Canada. Email:  
[ryan\\_o'connor@uqar.ca](mailto:ryan_o'connor@uqar.ca)

1 **Abstract**

2 Rising global temperatures are expected to increase reproductive costs for wildlife as greater  
3 thermoregulatory demands interfere with essential breeding activities such as parental care.  
4 However, predicting the temperature threshold where reproductive performance is negatively  
5 impacted remains a significant hurdle. Using a novel thermoregulatory polygon approach, we  
6 predicted the threshold temperature at which an Arctic songbird—the snow bunting  
7 (*Plectrophenax nivalis*)—would need to reduce activity and perform below the 4-times basal  
8 metabolic rate (BMR) required to sustain nestling provisioning to avoid overheating. We then  
9 compared this threshold to operative temperatures recorded at high (82°N) and low (64°N)  
10 Arctic sites to estimate how heat constraints translate into site-specific impacts on sustained  
11 activity level. We predict buntings would become behaviourally constrained at operative  
12 temperatures above 11.7°C, whereupon they must reduce provisioning rates to maintain thermal  
13 balance. Low Arctic sites had larger fluctuations in solar radiation, producing consistent daily  
14 periods when operative temperatures exceeded 11.7°C. However, high-latitude birds faced entire,  
15 consecutive days where parents would not be able to sustain required provisioning rates. These  
16 data indicate that Arctic warming is likely already disrupting the breeding performance of cold-  
17 specialist birds, but also suggests counterintuitive and severe negative impacts of warming at  
18 high-latitude breeding locations.  
19

## 20 **1. Introduction**

21 Animals frequently experience stages that demand significant increases in their sustained rate of  
22 energy expenditure (e.g., reproduction [1–3]). In an era of rapid climate change that is impacting  
23 species and ecosystems worldwide [4], understanding energetic limits and their causes is  
24 paramount for predicting whether organisms can respond to current rising global temperatures  
25 [5]. Historically, energetic limits among endotherms have either been attributed to intrinsic  
26 physiological factors (e.g., the digestive capacity of the gut to assimilate energy; central  
27 limitation hypothesis [6]) or constraints residing in the metabolic capacity of specific peripheral  
28 tissues (e.g., mammary glands or muscle tissue; peripheral limitation hypothesis [1]). Recently,  
29 Speakman and Król [7–9] proposed an alternative hypothesis, termed the heat dissipation limit  
30 (HDL) theory, which contends that the maximal rate of energy expenditure for an endothermic  
31 animal is limited by physiological factors governing heat dissipation capacity and the consequent  
32 avoidance of lethal body temperatures. Importantly, whereas the peripheral limitation hypothesis  
33 argues that energetic constraints may act on a range of tissues and organs (e.g., mammary glands,  
34 brown adipose tissue, or skeletal muscle), the HDL theory proposes a universal constraint in the  
35 form of heat dissipation and thereby provides a mechanistic link between an animal’s  
36 physiological capacity to maximize energy expenditure with the interplay between heat  
37 dissipation and ambient temperature.

38 Despite the significant conceptual gains that the HDL theory has provided in linking heat  
39 dissipation capacity with energetic expenditure, our ability to predict the ambient temperatures  
40 that will ultimately constrain an animal’s performance (i.e., sustained rate of energy expenditure)  
41 remains a major impediment to assessing species vulnerability to climate change [10]. Although  
42 several studies have reported threshold temperatures above which sustained activity and/or  
43 reproductive performance were compromised [10–14], these studies derived threshold values  
44 from post-hoc analyses on behavioral observations (e.g., provisioning rates) and are therefore not  
45 predictive by design. Recently, Rezende and Bacigalupe [15] proposed a predictive analytical  
46 tool - the thermoregulatory polygon - for estimating the dimensional space in which  
47 thermoregulation is possible given an animal’s combined rate of energy expenditure and the  
48 environmental temperatures it is operating within. Thermoregulatory polygons are built from  
49 commonly measured physiological variables (basal and maximal metabolic rate, and minimum  
50 and maximum thermal conductance) to delineate the boundaries in which heat production and

51 dissipation are balanced [15]. Thus, thermoregulatory polygons can help estimate animal  
52 responses to further warming by integrating concepts of the HDL theory to predict the ambient  
53 temperatures over which endothermic animals can sustain activity and avoid lethal body  
54 temperatures. Surprisingly, despite their potential as a predictive tool, to our knowledge only one  
55 study has applied thermoregulatory polygons, using them to predict the energetic consequences  
56 of activity time in nocturnal and diurnal mammals [5].

57 Among endotherms, birds are expected to be particularly sensitive to increasing  
58 environmental temperatures [16,17]. The offspring-rearing period for parents with dependent  
59 young requires substantial increases in sustained work effort, with adults typically performing at  
60 4 to 6 times their basal metabolic rate (i.e., resting rate of energy expenditure; [2,3,6]). Any  
61 excess heat generated as a by-product from foraging and provisioning must ultimately be  
62 dissipated, or birds risk overheating (hyperthermia). Problematically, birds often breed during the  
63 warmest parts of the year when it is hardest to passively shed body heat [18]. Indeed, birds often  
64 decrease activity on days with warmer ambient temperatures, which is likely a thermoregulatory  
65 response to avoid heat stress [19–23]. Recent studies have also shown that when a bird’s capacity  
66 to dissipate body heat is increased (e.g., by experimentally removing insulative feathers),  
67 provisioning adults can sustain higher levels of activity and invest more in both their current and  
68 future reproductive efforts [24–27]. Thus, reproductive performance can be constrained by a  
69 bird’s capacity to dissipate body heat produced during essential breeding activities, suggesting  
70 that increasing environmental temperatures could significantly impact reproductive investment.

71 Here, we apply a thermoregulatory polygon to snow buntings (*Plectrophenax nivalis*; figure  
72 1b), an Arctic-breeding songbird, to investigate how environmental temperature affects the  
73 interaction between thermoregulation and sustained energy expenditure on the breeding grounds.  
74 Applying thermoregulatory polygons to Arctic endotherms is extremely pertinent and valuable  
75 for predicting how increasing ambient temperatures under climate change will impact essential  
76 life-history stages through thermal constraints on behavior. Many Arctic animals are cold  
77 specialists and regularly endure extremely cold weather and have evolved physiological  
78 adaptations for minimizing heat loss [28–31]. Consequently, high-latitude breeding species are  
79 likely vulnerable to moderate increases in ambient temperature [32–35]; an alarming fact given  
80 that the Arctic has warmed faster than the global average and is expected to continue outpacing  
81 the global average over the 21<sup>st</sup> century [4]. In addition, O’Connor et al. [32] recently showed

82 that buntings in particular can become heat-stressed at even moderate air temperatures and that  
83 their evaporative cooling capacity is extremely limited. Consequently, highly active, breeding  
84 snow buntings exposed to constant solar radiation and modest rises in air temperature would be  
85 largely dependent on behavioural thermoregulatory strategies (e.g., reducing provisioning effort)  
86 as opposed to physiological mechanisms (e.g., sustained increases in evaporate water loss rates)  
87 to dissipate body heat and avoid lethal body temperatures.

88 Our goal was to estimate how sensitive snow buntings' performance may be to increasing  
89 Arctic temperatures, given their heat dissipation capacity. We first used thermal physiological  
90 data to construct a thermoregulatory polygon and predict the threshold temperatures at which  
91 sustainable performance (e.g., birds actively provisioning nestlings) would be expected to  
92 decline in buntings maintaining thermal balance (i.e., heat produced = heat dissipated). We then  
93 compared the thermoregulatory polygon prediction to both operative and air temperatures  
94 measured in the field at two latitudinally distant breeding sites to evaluate how heat constraints  
95 on bunting performance (i) differed between a low and high Arctic region, and (ii) could  
96 translate into site-specific impacts on reproductive performance and success.

97

## 98 **2. Materials and methods**

### 99 **(a) Operative and air temperature measurements**

100 We measured operative and air temperatures during the snow bunting breeding period at two  
101 research sites in northern Canada representing the low-Arctic (East Bay Island; 64°01'N,  
102 81°47'W; [36]) and high-Arctic (Alert; 82°30'N, 62°20'W; [37]; figure 1a). Operative  
103 temperature represents the temperature of the thermal environment as perceived by an individual  
104 and integrates the physical properties of the animal with the thermal properties of the local  
105 environment (e.g., air temperature, radiation, and wind; [38]). To measure the operative  
106 temperature perceived by snow buntings at our two sites, we used 3D printed, hollow plastic  
107 model birds (hereafter 3D models; [39,40]; figure 1c). We printed the 3D models to match the  
108 size and shape of an adult snow bunting (see electronic supplementary material, figure S1 in  
109 appendix S1). Additionally, we painted the 3D models to match the spectral properties of male  
110 snow buntings in breeding plumage, thereby allowing the 3D models to act as operative  
111 temperature thermometers. We painted the 3D models to match the color morph of male

112 buntings because males feed females while incubating [41] and consequently are exposed to  
113 solar radiation for a longer duration throughout the breeding period. We also focused on males  
114 given their simplified monochromatic breeding plumage [42] and because males actively  
115 provision offspring at similar rates to females [43]. We used a spectrophotometer (Ocean Optics  
116 Jaz spectrometer) to measure the spectra of the black (N = 16 birds) and white (N = 27 birds)  
117 feather regions of male snow buntings within the 300-700nm wavelengths. We used the *pavo*  
118 package in R [44] to convert the spectra wavelengths to a red:green:blue (R:G:B) color  
119 combination. We then used an R:G:B-to-paint converter ([https://www.e-paint.co.uk/convert-  
120 rgb.asp](https://www.e-paint.co.uk/convert-rgb.asp)) to acquire a paint that best matched the R:G:B color combination of male bunting  
121 feathers. We opted to paint the 3D models (N = 68 at the high-Arctic site and N = 13 at the low-  
122 Arctic site) instead of placing the skin and plumage of a male snow bunting over the models as  
123 this optimized our experimental design by allowing us to record operative temperature in  
124 numerous models simultaneously across a broader geographic area [45].

125 We measured the internal temperature of each 3D model by placing a temperature logger in  
126 the centre of each model. At the high-Arctic site, we drilled a hole in the belly of each 3D model  
127 and secured an iButton (model DS1921G-F5, Maxim Integrated, San Jose, CA USA) in the  
128 approximate center (figures S2 and S3 in appendix S1) by gluing it to the end of a wooden dowel  
129 surrounded by a rubber stopper, creating an airtight seal around the drill-hole (figure S4 in  
130 appendix S1). At the low-Arctic site, models were similarly set up except for using Hobo data  
131 loggers (Pendant model, MX2201, Onset Inc., Bourne, MA USA) instead of iButtons, which we  
132 secured with silicone caulking. At both sites, the 3D printed models were secured to a wooden  
133 plank by gluing a wooden dowel to a notch in the 3D model (figures S3 and S4 in appendix S1).  
134 We cut the wooden dowels to approximate the height of a standing snow bunting. We covered  
135 each plank in the field using the substrate beneath the models to mimic the thermal properties of  
136 snow bunting's natural environment (e.g., snow, moss, or rocky shale; figure S5 in appendix S1).

137 At each site, we deployed 3D models within representative breeding territories and across  
138 naturally occurring habitats to adequately capture the thermal heterogeneity experienced by  
139 buntings. In the high-Arctic, we recorded operative temperatures every 5 minutes from 22 May  
140 to 7 September 2019 and models were deployed over six separate periods, each lasting  
141 approximately 7 days (due to iButton memory limitations). After 7 days, we downloaded the  
142 operative temperature data and redeployed the 3D models to a new location. In the low-Arctic,

143 we originally deployed 22 models once and recorded operative temperatures continuously from  
144 11 June to 19 July 2019 at 2-min intervals. Unfortunately, polar bears damaged many models, so  
145 only 13 of our original 22 models were usable. However, the distribution of snow bunting  
146 breeding pairs at the low-Arctic site is much smaller in area than in the high-Arctic and these 13  
147 models thus still provided sufficient geographic coverage of East Bay's microclimates  
148 experienced by snow buntings.

149 At both study sites, we collected air temperature data to compare against operative  
150 temperatures. In the high-Arctic, the downloaded meteorological data was measured at the  
151 National Oceanic and Atmospheric Administration's (NOAA) broadband radiation station  
152 located adjacent to the Global Atmospheric Watch (GAW) Observatory (82°28'N, 62°30'W).  
153 These data are 1-min averages of air temperature obtained at a height of 3 m above the ground  
154 using an aspirated Vaisala HMP-235 (PT100 sensor). In the low-Arctic, we collected an air  
155 temperature value every 30-min using six Kestrel weather meters (model 5500, Boothwyn, PA,  
156 USA) placed 2-3 m above ground level at separate locations across the study site.

157

### 158 **(b) Thermoregulatory polygon parameters and construction**

159 Thermoregulatory polygons use an animals rate of energy expenditure and thermal conductance  
160 properties to delineate the space in which endotherms can balance heat production with heat loss  
161 under a given environmental temperature [15]. We calculated the basal metabolic rate (BMR; N  
162 = 28 birds), minimum wet thermal conductance ( $C_{\min}$ ; N = 20 birds) and maximum dry thermal  
163 conductance ( $C_{\max}$ ; N = 21 birds) on a wild population of snow buntings in the high-Arctic from  
164 2 June to 25 July 2018. Information on gas analyzers, experimental protocol, body and air  
165 temperature measurements, and equations used for calculating metabolic rates are described in  
166 detail in Le Pogam et al. [37,46,47] and O'Connor et al. [32]. Briefly, we measured BMR  
167 overnight on fasted individuals resting inside a darkened metabolic chamber at thermoneutral  
168 temperatures (mean air temperature =  $26.2 \pm 0.8^{\circ}\text{C}$ ; note, air temperature inside metabolic  
169 chambers is equivalent to operative temperature [38]). For  $C_{\min}$ , we measured metabolic rates on  
170 individuals at a constant air temperature below their lower critical temperature of  $10^{\circ}\text{C}$  ([28];  
171 mean  $C_{\min}$  air temperature =  $-19.0 \pm 1.8^{\circ}\text{C}$ ). We did not measure rates of evaporative water loss  
172 during our  $C_{\min}$  runs and therefore for each bird we calculated minimum wet thermal  
173 conductance as follows:



$$C_{min} = \frac{MR}{T_b - T_a} \quad Eq. 1$$

174

175 where MR represents metabolic rate in Watts, and  $T_b$  and  $T_a$  are the mean body and air  
176 temperatures, respectively. At air temperatures below the lower critical temperature, evaporative  
177 heat loss is minimal and thus its inclusion has little influence on  $C_{min}$  [48]. During metabolic  
178 measurements for  $C_{min}$ , we measured  $T_b$  at the start and end of each run and used the mean value  
179 for our calculations.

180

181 We determined maximum dry thermal conductance by exposing birds to a ramped  
182 temperature protocol of gradually increasing air temperatures [32]. We only included birds that  
183 tolerated air temperatures above  $31.5^\circ\text{C}$ , representing the mean air temperature minus the  
184 standard deviation at which buntings started panting [32], as we assumed that birds that had  
185 initiated panting had reached their maximum thermal conductance [49]. This resulted in the  
186 removal of only 1 bird from the final data set. At higher air temperatures, evaporative heat loss  
187 becomes significant and therefore must be accounted for in the calculation of maximum thermal  
188 conductance [48]. We thus calculated maximum dry thermal conductance for each bird as  
189 follows:

$$C_{max} = \frac{(MR - EHL)}{(T_b - T_a)} \quad Eq. 2$$

189

190 where EHL represents evaporative heat loss measured during respirometry trials [32]. During  
191  $C_{max}$  experiments, we measured  $T_b$  continuously and therefore were able to calculate an average  
192  $T_b$  over the same 5-min time window that metabolic rates were calculated [32].

193

194 To generate the thermoregulatory polygon, we calculated a combined mean across birds for  
195 each parameter (i.e., BMR,  $C_{min}$ ,  $C_{max}$  and  $T_b$ ). The BMR mean became the lower boundary of the  
196 thermoregulatory polygon. The  $C_{min}$  and  $C_{max}$  means became the slopes of the left and right  
197 boundaries, respectively. We calculated the y-intercepts for the  $C_{min}$  and  $C_{max}$  slopes using the  
198 equation:

$$MR = C(T_a) + b \quad Eq. 3$$

198

199 where C represents the combined  $C_{min}$  or  $C_{max}$  mean across birds and b is the y-intercept. We  
200 assumed  $T_a = T_b$  when  $MR = 0$  [48] and used the combined  $T_b$  mean across birds during  $C_{min}$   
( $41.0 \pm 0.4^\circ\text{C}$ ) and  $C_{max}$  ( $42.6 \pm 0.7$ ) measurements.

201

202 **(c) Estimating sustainable performance in the high-Arctic (Alert) and low-Arctic (East**  
203 **Bay)**

204 We conducted all analyses in R 4.0.4 [50]. Over the course of the field season in the high-Arctic,  
205 we recorded a total of 843,773 individual operative temperature values from 68 3D models and a  
206 total of 107,092 air temperature values. In the low-Arctic, we recorded 405,000 individual  
207 operative temperature values from 13 models and a total of 10,803 air temperature values. We  
208 used these raw temperature data to create a time series of operative and air temperatures for each  
209 site averaged at 1-h intervals using the *timeAverage* function in the *openair* package [51].

210 The discontinuous sampling protocol in the high-Arctic (e.g., downloading data and  
211 redeploying models) resulted in 643 1-h gaps in our operative temperature time series. To  
212 estimate the percentage of time on a given day that buntings would have been behaviorally  
213 constrained from heat (see below) it was necessary to fill these gaps in our data. We filled the  
214 operative temperature gaps by fitting an artificial neural network [52–54] with the *neuralnet*  
215 package [55] to predict operative temperature based on seven radiative and meteorological  
216 variables observed at the NOAA broadband radiation station. Specifically, the input layer of the  
217 neural network included air temperature, wind speed (m/s), downwelling shortwave radiation  
218 flux (calculated as the sum of the contributions from diffuse and direct shortwave radiation;  
219  $\text{W/m}^2$ ), reflected shortwave radiation flux ( $\text{W/m}^2$ ), albedo (calculated as the ratio of the reflected  
220 shortwave radiation flux to downwelling shortwave radiation flux), net longwave radiation flux  
221 (calculated by subtracting the longwave radiation flux emitted by the surface from the  
222 downwelling longwave radiation flux;  $\text{W/m}^2$ ), and diffuse fraction as a measure of the  
223 proportional influence of the direct sun and a proxy for cloudiness (calculated as the ratio of  
224 diffuse shortwave flux to total downwelling shortwave flux). Before training and testing the  
225 neural network, we applied a ranging standardization to the data, resulting in the data ranging  
226 between 0 and 1 [56]. We fitted the network with one hidden layer comprised of five neurons  
227 and trained the model using a random sample of 90% of the data set (1,752 values). The model  
228 was tested on a random sample of 10% of the data set (195 observations). We cross-validated the  
229 neural network by repeating the process (i.e., training, testing, and calculating mean square  
230 prediction error) 20 times consecutively. The neural network predicted hourly operative  
231 temperatures with an average mean square error of  $1.8^\circ\text{C}$  (range =  $1.2$  to  $2.7^\circ\text{C}$ ).

232 We next used the  $C_{\max}$  slope (i.e., the right-side upper boundary of the thermoregulatory  
233 polygon) to estimate the maximum sustainable energy expenditure of snow buntings maintaining  
234 thermal balance (i.e., heat production = heat loss) under both air temperature and operative  
235 temperature recordings. As the provisioning period is one of the most energetically expensive  
236 life-history stages for birds [3], we placed particular emphasis on the sustainable performance  
237 possible for buntings during this period. At the high-Arctic site, adult buntings are typically  
238 observed provisioning young from 4 July to 25 July (A. Le Pogam, personal observations) and at  
239 the low-Arctic site from 3 July to 24 July [42,43,57]. We thus used these respective date ranges  
240 to represent the typical provisioning period at each site. We defined performance as a multiple of  
241 BMR and assumed that 4-times BMR is the minimum sustainable performance required for adult  
242 buntings to adequately provision nestlings [2,3]. Therefore, we defined 4-times BMR as the  
243 energetic threshold for “optimal performance” and we calculated the percentage of time on a  
244 given day that buntings could work at either optimal ( $\geq 4$ -times BMR) or suboptimal ( $< 4$ -times  
245 BMR) performance levels based on either operative temperature or air temperature recordings.  
246 Lastly, we assumed buntings rested and significantly reduced provisioning rates for 3-h a day  
247 [58] and we only used temperature values measured between 01:00 and 22:00 hrs when  
248 calculating the daily percentage of time that buntings could work at optimal or suboptimal  
249 performance levels.

### 250 **3. Results**

#### 251 **(a) Thermoregulatory polygon**

252 All values reported are mean  $\pm$  standard deviation. The mean basal metabolic rate (BMR) of  
253 snow buntings was  $0.564 \pm 0.076$  W. Mean thermal conductance varied three-fold, with a  
254 calculated minimum wet thermal conductance of  $0.023 \pm 0.005$  W/°C and a maximum dry  
255 thermal conductance of  $0.073 \pm 0.023$  W/°C (figure 2a). The thermoregulatory polygon bounded  
256 by these physiological parameters predicts that snow buntings can maintain thermal balance and  
257 sustain optimal performance (i.e.,  $\geq 4$ -times BMR) at operative temperatures of up to 11.7°C  
258 (figure 2b). Once operative temperature exceeds 11.7°C, we expect buntings to become  
259 behaviorally constrained by heat and, consequently, forced to perform at suboptimal levels to  
260 avoid overheating. During the peak provisioning period when buntings are most active, operative

261 temperatures over both sites ranged from  $-0.6^{\circ}\text{C}$  to  $24.6^{\circ}\text{C}$ , leading to a  $12.3^{\circ}\text{C}$  zone in which we  
262 predict that buntings could maintain thermal balance and perform optimally (figure 2*b*).

263

264 **(b) Estimated sustainable performance in the high-Arctic (Alert) and low-Arctic (East Bay)**

265 Air and operative temperatures at the high-Arctic site increased steadily from the beginning of  
266 the breeding period until peaking during the nestling-provisioning period, and then gradually  
267 declined towards the post-fledging period (see electronic supplementary material, figure S1*a* in  
268 appendix S2). Operative temperatures experienced by buntings frequently exceeded shaded air  
269 temperature, and on average were  $3.5 \pm 3.1^{\circ}\text{C}$  warmer than air temperature (range of differences  
270 between operative and air temperature =  $-4.9^{\circ}\text{C}$  to  $14.5^{\circ}\text{C}$ ; figure S1*b* in appendix S2).

271 At the high-Arctic site, only operative temperature exceeded the predicted thermoregulatory  
272 polygon threshold value of  $11.7^{\circ}\text{C}$  before 5 July (figure 3*a*). However, from 5 July to 5 August,  
273 both air temperature and operative temperature measurements periodically exceeded  $11.7^{\circ}\text{C}$   
274 (figure 3*a*), suggesting that buntings would have had to regularly perform at suboptimal levels  
275 below 4-times BMR during this period. Within the typical nestling-provisioning period at the  
276 high-latitude site (i.e., 4 July to 25 July) when buntings are most energetically active, modelling  
277 based on the polygon predicts that buntings experienced multi-day periods where they could  
278 have either performed at optimal levels for their entire active period (i.e., 01:00 hrs to 22:00 hrs)  
279 or they would have been heat constrained and forced to work below 4-times BMR for the entire  
280 active period (figure 4*a*). For example, based on operative temperature recordings, there were  
281 two periods of consecutive days (9 to 11 July and 19 – 22 July) where we predict that buntings  
282 would never have been heat constrained and could have worked at optimal performance levels  
283 for their entire active period (figure 4*a*). However, there were two periods of consecutive days (6  
284 to 8 July and 13 to 17 July) when operative temperatures exceeded  $11.7^{\circ}\text{C}$  for their entire active  
285 period, and we predict that buntings would have to reduce their provisioning rates to lower  
286 metabolic heat production and avoid lethal body temperatures. From 13 to 19 July the polygon  
287 model also predicted that buntings experienced only 5 hours with temperatures that allowed them  
288 to both maintain thermal balance and sustain an optimal performance level of  $\geq 4$ -times BMR.  
289 These findings suggest that temporal variation in heat constraints on the sustainable performance  
290 of breeding snow buntings in the high-Arctic correspond to synoptic cycles (i.e., weather-scale,  
291 2-4 days) rather than regular circadian cycles. This is explainable by the suppressed amplitude of

292 the diurnal cycle at the high latitude site where the sun is above the horizon continuously from  
293 early April through early September. Overall, under operative temperature recordings at the  
294 high-Arctic site, the percentage of time each day that buntings would have been behaviorally  
295 constrained from heat during their active period ranged from a minimum of 19% (4 hrs) to a  
296 maximum of 100% (21 hrs; figure 4a).

297 At the low-Arctic site, average hourly temperatures were relatively consistent across the  
298 study period (figure S2a in appendix S2). The overall mean difference between operative and air  
299 temperature was  $4.0 \pm 4.1$  (range =  $-2.7^{\circ}\text{C}$  to  $15.5^{\circ}\text{C}$ ; figure S2b in appendix S2). In contrast to  
300 the high-Arctic site, where both operative and air temperature recordings exceeded the  
301 thermoregulatory polygon threshold temperature of  $11.7^{\circ}\text{C}$ , only operative temperature  
302 recordings at the low-Arctic site consistently placed a heat constraint on buntings' sustainable  
303 performance (figure 3b). For example, during the typical nestling-provisioning period in the low-  
304 Arctic (i.e., 3 July to 24 July), modelling based on the polygon predicted that buntings would  
305 have been behaviorally constrained on just four days using measured air temperature values,  
306 whereas operative temperature values suggest that bunting performance would have been  
307 constrained to some degree on 15 of the 17 days during which temperatures were recorded  
308 (figure 4b). Furthermore, unlike the high-Arctic birds, buntings at the low-Arctic site would not  
309 be forced to perform at suboptimal levels for their entire active period (i.e., an entire day), but  
310 would instead be forced to alter performance for a portion of each day (figure 4b). Overall, under  
311 measured operative temperatures at the low-Arctic site, the percentage of time that buntings  
312 would have been behaviorally constrained from heat on a given day during their active period  
313 (i.e., 01:00 to 22:00 hrs) ranged from a minimum of 5% (1 hr) to a maximum of 67% (14 hrs;  
314 figure 4b).

315

#### 316 **4. Discussion**

317 A growing body of evidence suggests that increasing environmental temperatures associated  
318 with climate change will impose reproductive costs on birds via trade-offs between essential  
319 breeding behaviours and the need to dissipate body heat and avoid lethal body temperatures  
320 [10,11,17,25,59,60]. To date, predicting the threshold temperatures that will adversely affect  
321 breeding activity has been a limiting factor in forecasting the impacts of anthropogenic climate  
322 change on birds. Additionally, studies on how thermoregulatory demands will negatively impact

323 breeding behaviour within birds is overwhelmingly biased towards hot, arid climates while  
324 studies on Arctic birds are severely lacking.

325 Using a thermoregulatory polygon approach, we estimated the maximal sustained energy  
326 expenditure in an Arctic songbird maintaining thermal balance across a range of environmental  
327 temperatures. Assuming an optimal performance level of 4-times basal metabolic rate (BMR;  
328 [3]), our findings predict that buntings will become heat constrained at operative temperatures  
329 above 11.7°C. At this point, buntings would need to reduce their maximal sustained energy  
330 expenditure and provision their offspring at sub-optimal performance levels to balance heat loads  
331 and avoid a lethal body temperature. Additionally, by examining impacts at both a low and high  
332 Arctic breeding site, our data reveal latitude-dependent operative temperature traces, likely  
333 linked to differences in available sunlight and solar radiation input, culminating in site-specific  
334 patterns in the heat constraints placed on an animal's maximal sustained energy expenditure.  
335 Consequently, synoptic-scale influences on local temperature apparently dominate in modulating  
336 operative temperatures in the high-Arctic, whereas the diurnal cycle is the dominant factor in the  
337 low-Arctic. Collectively our results indicate that while Arctic warming will expose all snow  
338 bunting populations to more periods above their threshold temperature for sustained optimal  
339 performance, high-Arctic birds will likely face increases in the duration and magnitude of these  
340 periods due to the added effects of a higher average solar radiative flux. The expectation then  
341 will be that high-Arctic populations will face greater downstream costs to reproductive  
342 performance (e.g., provisioning rates), and therefore ultimately breeding success compared to  
343 low-Arctic populations.

344

#### 345 **(a) Using the thermoregulatory polygon to predict thermal constraints**

346 The heat dissipation limit theory postulates that an animal's maximum sustained energy  
347 expenditure scales with its capacity to dissipate body heat [8]. Many factors influence an  
348 animal's thermoregulatory ability, including basal metabolic rate and thermal conductance [61–  
349 64]. Based on buntings' basal metabolic rate (0.564 W) and maximum dry thermal conductance  
350 (0.073 W/°C), the thermoregulatory polygon predicts that at operative temperatures above  
351 11.7°C, snow buntings cannot maintain thermal balance and sustain activity at optimal  
352 expenditure rates of 4-times basal metabolic rate. Therefore, if operative temperature exceeds  
353 11.7°C for extended periods, we would expect to observe (i) a decline in the body condition of



354 breeding adults as they increase evaporative water loss rates to maintain foraging effort and  
355 provisioning rates outside of the thermoregulatory polygon limits [11,59,65] and/or (ii) a slower  
356 growth rate, prolonged breeding period and potentially reduced fledging mass as adults reduce  
357 provisioning rates to avoid lethal body temperatures [13,41,66–68]. Although not derived under  
358 the thermoregulatory polygon framework, Cunningham et al. [12] reported lower provisioning  
359 rates at higher ambient temperatures in common fiscals (*Lanius collaris*) and fledglings were  
360 significantly lighter if maximum air temperature often exceeded a threshold temperature of 33°C.  
361 The comparatively low threshold temperature for buntings (11.7°C) likely stems from their  
362 physiological adaptations for life in the cold [37]. Consequently, snow buntings' cold  
363 specialization appears to come at the cost of not being able to adequately dissipate heat through  
364 increases in maximum thermal conductance at even moderate operative temperatures.

365 Because the thermoregulatory polygon boundaries are set by the thermal conductance of the  
366 animal, they represent the thermal space in which an animal can balance heat loss and gain  
367 through sensible heat flow (i.e., non-evaporative mechanisms). Theoretically, an animal could  
368 maintain thermal balance and sustain a high rate of energy expenditure outside its  
369 thermoregulatory polygon by continuously dissipating body heat evaporatively. However, long-  
370 term evaporative water loss is not sustainable and evaporative cooling capacities vary  
371 significantly among species [16,69,70]. Recently, O'Connor et al. [32] showed that the  
372 evaporative cooling capacity of buntings is extremely limited, with most birds unable to  
373 evaporatively shed an amount of heat equivalent to their metabolic heat production. Therefore, it  
374 is unlikely that snow buntings can rely on evaporative cooling for prolonged periods to sustain  
375 activity outside their thermoregulatory polygon limits, and, instead, will be highly dependent on  
376 behavioral thermoregulation.

377

### 378 **(b) Site-specific impacts of thermal constraints on breeding performance and success**

379 Solar radiation is a major driving force of operative temperature and can vary by time of day,  
380 year, or geographic location [52,71]. Our two sites represent the general southern and northern  
381 breeding limits for Arctic-breeding snow bunting populations in Canada [58], and are separated  
382 by ~18° latitude. This latitudinal gap results in different quantities of solar radiation reaching the  
383 earth's surface [52], likely producing the significant differences observed in the duration and  
384 frequency that operative temperature exceeded the predicted threshold temperature. For example,

385 during the peak nestling-provisioning period, buntings at the high-Arctic site were predicted to  
386 frequently experience consecutive days where they would not be able to perform at 4-times their  
387 BMR. In contrast, buntings in the low-Arctic were predicted to experience shorter, but more  
388 consistent heat constraints on provisioning activity almost every day. Given that snow bunting  
389 nestlings have some of the highest recorded growth rates of any passerine (11.6-13.0 %/day of  
390 adult body mass; [72]), these latitudinal differences in constraints suggest that warming will  
391 produce different impacts on provisioning behaviour and hence offspring growth and survival at  
392 different populations. For instance, lower-latitude breeding birds could possibly make up for  
393 reduced provisioning opportunities each day by adjusting their activity budget throughout the  
394 day; working harder during the cooler periods to counteract overheating risks during warmer  
395 periods [5,73]. Indeed, under identical heat loads, Tapper et al. [27] observed higher feeding  
396 rates in wild female tree swallows (*Tachycineta bicolor*) that had their ventral feathers clipped to  
397 experimentally increase heat dissipation rates relative to unclipped females. Alternatively,  
398 parents breeding at lower latitudes could provision growing nestlings at lower rates per day and  
399 possibly extend the developmental period of the growing young. However, this could  
400 nonetheless impose survival constraints on nestlings and fledglings given that ground-nesting  
401 songbird species have evolved rapid growth rates and shorter in-nest development periods due to  
402 high rates of nest predation [74,75], as well as the short, ephemeral nature of productivity in  
403 insects required for offspring growth [76–78].

404 For higher latitude populations, the accumulation of reduced provisioning opportunities for  
405 consecutive days could impose substantial developmental costs on nestling development that  
406 may simply be too great for parents to compensate for on cooler days. Chick provisioning in  
407 buntings typically lasts 13 days; lowering provisioning rates for 3-4 consecutive days could have  
408 major impacts on chick condition at fledging, and possibly, post-fledging survival [60,79,80].  
409 Consequently, as rapid Arctic warming continues [4], the temperature-dependent costs on  
410 reproductive performance may be more strongly felt at higher latitudes where climatic and  
411 meteorological patterns subject individuals to unique operative temperature cycles, with above  
412 threshold temperatures potentially lasting for days at the peak of breeding activities. It is worth  
413 noting, however, that our 3D models were painted to match the male color morph and therefore  
414 represent operative temperatures perceived by male snow buntings. During the provisioning  
415 period, both male and female buntings feed young and thus the operative temperatures



416 experienced by females may differ from males leading to different sex constraints on  
417 performance. For instance, females lack the full dark back of male buntings and hence may  
418 experience lower operative temperatures allowing them to maintain higher provisioning rates  
419 than males. Nevertheless, under such a scenario, we would still predict negative impacts on  
420 nestling condition and fledgling success as both parents cannot adequately feed young at optimal  
421 rates.

422         The thermal environment experienced by wild animals represents a complex integration  
423 of biotic and abiotic factors operating at spatial scales relevant to the size of the animal  
424 [38,81,82]. The thermal environment, as measured by operative or standard operative  
425 temperature [83], can significantly deviate from air temperature [32,84]. Indeed, we found that  
426 operative temperature was, on average, 3.5 to 4.0 °C above air temperature but could exceed it  
427 by as much as 14.5 or 15.5°C. More importantly, our data show that the duration and frequency  
428 that the threshold temperature was exceeded markedly differed depending on the heat index used  
429 (i.e., air temperature or operative temperature). The implication of these differences is significant  
430 because any derived predictions for maximal sustained energy expenditure under increasing  
431 global temperatures will be substantially different whether air temperature or operative  
432 temperature measurements are used. For example, using air temperature alone at the low-Arctic  
433 site, we would predict that snow buntings are seldom heat constrained and can currently sustain  
434 optimal energy expenditures, despite operative temperatures indicating otherwise. In contrast, at  
435 the high-Arctic site during the peak provisioning period, air temperature measurements often  
436 exceeded the temperature threshold alongside operative temperature but the percentage of time  
437 that buntings were constrained was greater under operative temperature. Consequently, using air  
438 temperature alone, especially values derived at macroscales (e.g., WorldClim dataset at 1 km<sup>2</sup>  
439 [85]), will certainly misrepresent an animals realized thermal environment, which operates at  
440 microscales, leading to biased and erroneous predictions on the impacts of climate change  
441 [86,87].

442 **References**

- 443 1. Peterson CC, Nagy KA, Diamond J. 1990 Sustained metabolic scope. *Proc. Natl. Acad.*  
444 *Sci.* **87**, 2324–2328. (doi:10.1073/pnas.87.6.2324)
- 445 2. Piersma T. 2011 Why marathon migrants get away with high metabolic ceilings: towards  
446 an ecology of physiological restraint. *J. Exp. Biol.* **214**, 295–302.  
447 (doi:10.1242/jeb.046748)
- 448 3. Drent RH, Daan S. 1980 The Prudent Parent: Energetic Adjustments in Avian Breeding.  
449 *Ardea* **68**, 225–252. (doi:10.5253/arde.v68.p225)
- 450 4. IPCC *et al.* 2021 Climate Change 2021: The Physical Science Basis. Contribution of  
451 Working Group I to the Sixth Assessment Report of the Intergovernmental Panel on  
452 Climate Change. *Cambridge Univ. Press*
- 453 5. Bonebrake TC, Rezende EL, Bozinovic F. 2020 Climate Change and Thermoregulatory  
454 Consequences of Activity Time in Mammals. *Am. Nat.* **196**, 45–56. (doi:10.1086/709010)
- 455 6. Weiner J. 1992 Physiological limits to sustainable energy budgets in birds and mammals:  
456 Ecological implications. *Trends Ecol. Evol.* **7**, 384–388. (doi:10.1016/0169-  
457 5347(92)90009-Z)
- 458 7. Speakman JR, Król E. 2010 Maximal heat dissipation capacity and hyperthermia risk:  
459 neglected key factors in the ecology of endotherms. *J. Anim. Ecol.* **79**, 726–46.  
460 (doi:10.1111/j.1365-2656.2010.01689.x)
- 461 8. Speakman JR, Król E. 2011 Limits to sustained energy intake. XIII. Recent progress and  
462 future perspectives. *J. Exp. Biol.* **214**, 230–241. (doi:10.1242/jeb.048603)
- 463 9. Speakman JR, Król E. 2010 The Heat Dissipation Limit Theory and Evolution of Life  
464 Histories in Endotherms—Time to Dispose of the Disposable Soma Theory? *Integr.*  
465 *Comp. Biol.* **50**, 793–807. (doi:10.1093/icb/icq049)
- 466 10. Smit B, Zietsman G, Martin RO, Cunningham SJ, McKechnie AE, Hockey PAR. 2016  
467 Behavioural responses to heat in desert birds: implications for predicting vulnerability to  
468 climate warming. *Clim. Chang. Responses* **3**, 9. (doi:10.1186/s40665-016-0023-2)
- 469 11. du Plessis KL, Martin RO, Hockey PAR, Cunningham SJ, Ridley AR. 2012 The costs of  
470 keeping cool in a warming world: implications of high temperatures for foraging,  
471 thermoregulation and body condition of an arid-zone bird. *Glob. Chang. Biol.* **18**, 3063–  
472 3070. (doi:10.1111/j.1365-2486.2012.02778.x)

- 473 12. Cunningham SJ, Martin RO, Hojem CL, Hockey P a. R. 2013 Temperatures in Excess of  
474 Critical Thresholds Threaten Nestling Growth and Survival in A Rapidly-Warming Arid  
475 Savanna: A Study of Common Fiscals. *PLoS One* **8**, e74613.  
476 (doi:10.1371/journal.pone.0074613)
- 477 13. van de Ven TMFN, McKechnie AE, Er S, Cunningham SJ. 2020 High temperatures are  
478 associated with substantial reductions in breeding success and offspring quality in an arid-  
479 zone bird. *Oecologia* **193**, 225–235. (doi:10.1007/s00442-020-04644-6)
- 480 14. Oswald KN, Smit B, Lee ATK, Peng CL, Brock C, Cunningham SJ. 2021 Higher  
481 temperatures are associated with reduced nestling body condition in a range-restricted  
482 mountain bird. *J. Avian Biol.* **52**, jav.02756. (doi:10.1111/jav.02756)
- 483 15. Rezende EL, Bacigalupe LD. 2015 Thermoregulation in endotherms: physiological  
484 principles and ecological consequences. *J. Comp. Physiol. B* **185**, 709–727.  
485 (doi:10.1007/s00360-015-0909-5)
- 486 16. Albright TP, Mutibwa D, Gerson AR, Smith EK, Talbot WA, O’Neill JJ, McKechnie AE,  
487 Wolf BO. 2017 Mapping evaporative water loss in desert passerines reveals an expanding  
488 threat of lethal dehydration. *Proc. Natl. Acad. Sci.* **114**, 2283–2288.  
489 (doi:10.1073/pnas.1613625114)
- 490 17. Conradie SR, Woodborne SM, Cunningham SJ, McKechnie AE. 2019 Chronic, sublethal  
491 effects of high temperatures will cause severe declines in southern African arid-zone birds  
492 during the 21st century. *Proc. Natl. Acad. Sci.* **116**, 14065–14070.  
493 (doi:10.1073/pnas.1821312116)
- 494 18. Campbell GS, Norman JM. 1998 *An Introduction to Environmental Biophysics*. New  
495 York, NY: Springer New York. (doi:10.1007/978-1-4612-1626-1)
- 496 19. Austin G. 1976 Behavioral Adaptations of the Verdin to the Desert. *Auk* **93**, 245–262.  
497 (doi:10.1093/auk/93.2.245)
- 498 20. Murphy MT. 1985 Nestling eastern kingbird growth: effects of initial size and ambient  
499 temperature. *Ecology* **66**, 162–170. (doi:10.2307/1941316)
- 500 21. Clark L. 1987 Thermal constraints on foraging in adult european starlings. *Oecologia* **71**,  
501 233–238. (doi:10.1007/BF00377289)
- 502 22. Silva JP, Catry I, Palmeirim JM, Moreira F. 2015 Freezing heat: Thermally imposed  
503 constraints on the daily activity patterns of a free-ranging grassland bird. *Ecosphere* **6**.

- 504 (doi:10.1890/ES14-00454.1)
- 505 23. Oswald KN, Smit B, Lee ATK, Cunningham SJ. 2019 Behaviour of an alpine range-  
506 restricted species is described by interactions between microsite use and temperature.  
507 *Anim. Behav.* **157**, 177–187. (doi:10.1016/j.anbehav.2019.09.006)
- 508 24. Nord A, Nilsson J. 2019 Heat dissipation rate constrains reproductive investment in a wild  
509 bird. *Funct. Ecol.* **33**, 250–259. (doi:10.1111/1365-2435.13243)
- 510 25. Andreasson F, Nilsson J-Å, Nord A. 2020 Avian Reproduction in a Warming World.  
511 *Front. Ecol. Evol.* **8**. (doi:10.3389/fevo.2020.576331)
- 512 26. Tapper S, Nocera JJ, Burness G. 2020 Experimental evidence that hyperthermia limits  
513 offspring provisioning in a temperate-breeding bird. *R. Soc. Open Sci.* **7**, 201589.  
514 (doi:10.1098/rsos.201589)
- 515 27. Tapper S, Nocera JJ, Burness G. 2020 Heat dissipation capacity influences reproductive  
516 performance in an aerial insectivore. *J. Exp. Biol.* **223**, jeb222232.  
517 (doi:10.1242/jeb.222232)
- 518 28. Scholander PF, Hock R, Walters V, Johnson F, Irving L. 1950 Heat regulation in some  
519 Arctic and tropical mammals and birds. *Biol. Bull.* **99**, 237–258. (doi:10.2307/1538741)
- 520 29. Gabrielsen GW, Mehlum F, Karlsen HE. 1988 Thermoregulation in four species of arctic  
521 seabirds. *J. Comp. Physiol. B* **157**, 703–708. (doi:10.1007/BF00691000)
- 522 30. Jetz W, Freckleton RP, McKechnie AE. 2008 Environment, Migratory Tendency,  
523 Phylogeny and Basal Metabolic Rate in Birds. *PLoS One* **3**, e3261.  
524 (doi:10.1371/journal.pone.0003261)
- 525 31. Blix AS. 2016 Adaptations to polar life in mammals and birds. *J. Exp. Biol.* **219**, 1093–  
526 1105. (doi:10.1242/jeb.120477)
- 527 32. O'Connor RS *et al.* 2021 Limited heat tolerance in an Arctic passerine: Thermoregulatory  
528 implications for cold-specialized birds in a rapidly warming world. *Ecol. Evol.* **11**, 1609–  
529 1619. (doi:10.1002/ece3.7141)
- 530 33. Oswald SA, Arnold JM. 2012 Direct impacts of climatic warming on heat stress in  
531 endothermic species: seabirds as bioindicators of changing thermoregulatory constraints.  
532 *Integr. Zool.* **7**, 121–136. (doi:10.1111/j.1749-4877.2012.00287.x)
- 533 34. Oswald SA, Bearhop S, Furness RW, Huntley B, Hamer KC. 2008 Heat stress in a high-  
534 latitude seabird: effects of temperature and food supply on bathing and nest attendance of

- 535 great skuas *Catharacta skua*. *J. Avian Biol.* **39**, 163–169. (doi:10.1111/j.2008.0908-  
536 8857.04187.x)
- 537 35. Choy ES, O'Connor RS, Gilchrist HG, Hargreaves AL, Love OP, Vézina F, Elliott KH.  
538 2021 Limited heat tolerance in a cold-adapted seabird: implications of a warming Arctic.  
539 *J. Exp. Biol.* **224**. (doi:10.1242/jeb.242168)
- 540 36. McKinnon EA, Macdonald CM, Gilchrist HG, Love OP. 2016 Spring and fall migration  
541 phenology of an Arctic-breeding passerine. *J. Ornithol.* **157**, 681–693.  
542 (doi:10.1007/s10336-016-1333-7)
- 543 37. Le Pogam A *et al.* 2021 Snow Buntings Maintain Winter-Level Cold Endurance While  
544 Migrating to the High Arctic. *Front. Ecol. Evol.* **9**. (doi:10.3389/fevo.2021.724876)
- 545 38. Bakken GS. 1976 A heat transfer analysis of animals: Unifying concepts and the  
546 application of metabolism chamber data to field ecology. *J. Theor. Biol.* **60**, 337–384.  
547 (doi:10.1016/0022-5193(76)90063-1)
- 548 39. Watson CM, Francis GR. 2015 Three dimensional printing as an effective method of  
549 producing anatomically accurate models for studies in thermal ecology. *J. Therm. Biol.*  
550 **51**, 42–46. (doi:10.1016/j.jtherbio.2015.03.004)
- 551 40. O'Connor RS, Brigham RM, McKechnie AE. 2018 Extreme operative temperatures in  
552 exposed microsites used by roosting Rufous-cheeked Nightjars (*Caprimulgus rufigena*):  
553 implications for water balance under current and future climate conditions. *Can. J. Zool.*  
554 **96**, 1122–1129. (doi:10.1139/cjz-2017-0310)
- 555 41. Lyon BE, Montgomerie RD. 1985 Incubation feeding in snow buntings: female  
556 manipulation or indirect male parental care? *Behav. Ecol. Sociobiol.* **17**, 279–284.  
557 (doi:10.1007/BF00300147)
- 558 42. Guindre-Parker S, Gilchrist HG, Baldo S, Doucet SM, Love OP. 2013 Multiple  
559 achromatic plumage ornaments signal to multiple receivers. *Behav. Ecol.* **24**, 672–682.  
560 (doi:10.1093/beheco/ars215)
- 561 43. Guindre-Parker S, Gilchrist HG, Baldo S, Love OP. 2013 Alula size signals male  
562 condition and predicts reproductive performance in an Arctic-breeding passerine. *J. Avian*  
563 *Biol.* **44**, 209–215. (doi:10.1111/j.1600-048X.2012.05817.x)
- 564 44. Maia R, Gruson H, Endler JA, White TE. 2019 pavo 2: New tools for the spectral and  
565 spatial analysis of colour in r. *Methods Ecol. Evol.* **10**, 1097–1107. (doi:10.1111/2041-

- 566 210X.13174)
- 567 45. Dzialowski EM. 2005 Use of operative temperature and standard operative temperature  
568 models in thermal biology. *J. Therm. Biol.* **30**, 317–334.  
569 (doi:10.1016/j.jtherbio.2005.01.005)
- 570 46. Le Pogam A, Love OP, Régimbald L, Dubois K, Hallot F, Milbergue M, Petit M,  
571 O’Connor RS, Vézina F. 2020 Wintering Snow Buntings Elevate Cold Hardiness to  
572 Extreme Levels but Show No Changes in Maintenance Costs. *Physiol. Biochem. Zool.* **93**,  
573 417–433. (doi:10.1086/711370)
- 574 47. Le Pogam A, O’Connor RS, Love OP, Petit M, Régimbald L, Vézina F. 2021 Coping with  
575 the worst of both worlds: Phenotypic adjustments for cold acclimatization benefit  
576 northward migration and arrival in the cold in an Arctic-breeding songbird. *Funct. Ecol.*  
577 **35**, 1240–1254. (doi:10.1111/1365-2435.13793)
- 578 48. McNab BK. 1980 On Estimating Thermal Conductance in Endotherms. *Physiol. Zool.* **53**,  
579 145–156. (doi:10.1086/physzool.53.2.30152577)
- 580 49. Tieleman BI, Williams JB, LaCroix F, Paillat P. 2002 Physiological responses of Houbara  
581 bustards to high ambient temperatures. *J. Exp. Biol.* **205**, 503–511.  
582 (doi:10.1242/jeb.205.4.503)
- 583 50. Team RC. 2021 R: language and environment for statistical computing, Vienna, Austria.
- 584 51. Carslaw DC, Ropkins K. 2012 openair — An R package for air quality data analysis.  
585 *Environ. Model. Softw.* **27–28**, 52–61. (doi:10.1016/j.envsoft.2011.09.008)
- 586 52. Angilletta Jr. MJ. 2009 *Thermal Adaptation*. Oxford University Press.  
587 (doi:10.1093/acprof:oso/9780198570875.001.1)
- 588 53. Bryant SR, Shreeve TG. 2002 The use of artificial neural networks in ecological analysis:  
589 estimating microhabitat temperature. *Ecol. Entomol.* **27**, 424–432. (doi:10.1046/j.1365-  
590 2311.2002.00422.x)
- 591 54. Lek S, Guégan JF. 1999 Artificial neural networks as a tool in ecological modelling, an  
592 introduction. *Ecol. Modell.* **120**, 65–73. (doi:10.1016/S0304-3800(99)00092-7)
- 593 55. Fritsch S, Guenther F, Wright MN. 2019 neuralnet: training of neural networks.
- 594 56. Quinn GP, Keough MJ. 2002 *Experimental Design and Data Analysis for Biologists*.  
595 Cambridge University Press. (doi:10.1017/CBO9780511806384)
- 596 57. Baldo S, Mennill DJ, Guindre-Parker S, Gilchrist HG, Love OP. 2015 The Oxidative Cost



- 597 of Acoustic Signals: Examining Steroid Versus Aerobic Activity Hypotheses in a Wild  
598 Bird. *Ethology* **121**, 1081–1090. (doi:10.1111/eth.12424)
- 599 58. Montgomerie R, Lyon B. 2020 Snow Bunting (*Plectrophenax nivalis*). In *Birds of the*  
600 *World* (eds SM Billerman, BK Keeney, PG Rodewald, TS Schulenberg), Cornell Lab of  
601 Ornithology. (doi:10.2173/bow.snobun.01)
- 602 59. van de Ven TMFN, McKechnie AE, Cunningham SJ. 2019 The costs of keeping cool:  
603 behavioural trade-offs between foraging and thermoregulation are associated with  
604 significant mass losses in an arid-zone bird. *Oecologia* **191**, 205–215.  
605 (doi:10.1007/s00442-019-04486-x)
- 606 60. Cunningham SJ, Gardner JL, Martin RO. 2021 Opportunity costs and the response of  
607 birds and mammals to climate warming. *Front. Ecol. Environ.* **19**, 300–307.  
608 (doi:10.1002/fee.2324)
- 609 61. Bartholomew GA, Hudson JW, Howell TR. 1962 Body Temperature, Oxygen  
610 Consumption, Evaporative Water Loss, and Heart Rate in the Poor-Will. *Condor* **64**, 117–  
611 125. (doi:10.2307/1365480)
- 612 62. Weathers WW. 1979 Climatic adaptation in avian standard metabolic rate. *Oecologia* **42**,  
613 81–89. (doi:10.1007/BF00347620)
- 614 63. Tattersall GJ, Sinclair BJ, Withers PC, Fields PA, Seebacher F, Cooper CE, Maloney SK.  
615 2012 Coping with Thermal Challenges: Physiological Adaptations to Environmental  
616 Temperatures. In *Comprehensive Physiology*, pp. 2151–2202. Wiley.  
617 (doi:10.1002/cphy.c110055)
- 618 64. Fristoe TS, Burger JR, Balk M a., Khaliq I, Hof C, Brown JH. 2015 Metabolic heat  
619 production and thermal conductance are mass-independent adaptations to thermal  
620 environment in birds and mammals. *Proc. Natl. Acad. Sci.* **112**, 15934–15939.  
621 (doi:10.1073/pnas.1521662112)
- 622 65. Sharpe L, Cale B, Gardner JL. 2019 Weighing the cost: the impact of serial heatwaves on  
623 body mass in a small Australian passerine. *J. Avian Biol.* **50**, jav.02355.  
624 (doi:10.1111/jav.02355)
- 625 66. Lyon BE, Montgomerie RD, Hamilton LD. 1987 Male parental care and monogamy in  
626 snow buntings. *Behav. Ecol. Sociobiol.* **20**, 377–382. (doi:10.1007/BF00300684)
- 627 67. Wiley EM, Ridley AR. 2016 The effects of temperature on offspring provisioning in a

- 628 cooperative breeder. *Anim. Behav.* **117**, 187–195. (doi:10.1016/j.anbehav.2016.05.009)
- 629 68. Salaberria C, Celis P, López-Rull I, Gil D. 2014 Effects of temperature and nest heat  
630 exposure on nestling growth, dehydration and survival in a Mediterranean hole-nesting  
631 passerine. *Ibis (Lond. 1859)*. **156**, 265–275. (doi:10.1111/ibi.12121)
- 632 69. Riddell EA, Iknayan KJ, Wolf BO, Sinervo B, Beissinger SR. 2019 Cooling requirements  
633 fueled the collapse of a desert bird community from climate change. *Proc. Natl. Acad. Sci.*  
634 **116**, 21609–21615. (doi:10.1073/pnas.1908791116)
- 635 70. McKechnie AE, Gerson AR, Wolf BO. 2021 Thermoregulation in desert birds: scaling  
636 and phylogenetic variation in heat tolerance and evaporative cooling. *J. Exp. Biol.* **224**,  
637 jeb229211. (doi:10.1242/jeb.229211)
- 638 71. McCullough EC, Porter WP. 1971 Computing clear day solar radiation spectra for the  
639 terrestrial ecological environment. *Ecology* **52**, 1008–1015. (doi:10.2307/1933806)
- 640 72. Hussell DJT. 1972 Factors Affecting Clutch Size in Arctic Passerines. *Ecol. Monogr.* **42**,  
641 317–364. (doi:10.2307/1942213)
- 642 73. Voigt CC, Lewanzik D. 2011 Trapped in the darkness of the night: thermal and energetic  
643 constraints of daylight flight in bats. *Proc. R. Soc. B Biol. Sci.* **278**, 2311–2317.  
644 (doi:10.1098/rspb.2010.2290)
- 645 74. Ibáñez-Álamo JD, Magrath RD, Oteyza JC, Chalfoun AD, Haff TM, Schmidt KA,  
646 Thomson RL, Martin TE. 2015 Nest predation research: recent findings and future  
647 perspectives. *J. Ornithol.* **156**, 247–262. (doi:10.1007/s10336-015-1207-4)
- 648 75. Callan LM, La Sorte FA, Martin TE, Rohwer VG. 2019 Higher Nest Predation Favors  
649 Rapid Fledging at the Cost of Plumage Quality in Nestling Birds. *Am. Nat.* **193**, 717–724.  
650 (doi:10.1086/702856)
- 651 76. Falconer CM, Mallory ML, Nol E. 2008 Breeding biology and provisioning of nestling  
652 snow buntings in the Canadian High Arctic. *Polar Biol.* **31**, 483–489.  
653 (doi:10.1007/s00300-007-0374-z)
- 654 77. Bolduc E *et al.* 2013 Terrestrial arthropod abundance and phenology in the Canadian  
655 Arctic: modelling resource availability for Arctic-nesting insectivorous birds. *Can.*  
656 *Entomol.* **145**, 155–170. (doi:10.4039/tce.2013.4)
- 657 78. Marier PJ. 2015 Linking climate, arthropod emergence, and fitness in snow buntings  
658 (*Plectrophenax nivalis*). University of Windsor. See <https://scholar.uwindsor.ca/etd/5500>.



- 659 79. Bourne AR, Cunningham SJ, Spottiswoode CN, Ridley AR. 2020 High temperatures drive  
660 offspring mortality in a cooperatively breeding bird. *Proc. R. Soc. B Biol. Sci.* **287**,  
661 20201140. (doi:10.1098/rspb.2020.1140)
- 662 80. Greño JL, Belda EJ, Barba E. 2008 Influence of temperatures during the nestling period  
663 on post-fledging survival of great tit *Parus major* in a Mediterranean habitat. *J. Avian Biol.*  
664 **39**, 41–49. (doi:10.1111/j.0908-8857.2008.04120.x)
- 665 81. Potter KA, Arthur Woods H, Pincebourde S. 2013 Microclimatic challenges in global  
666 change biology. *Glob. Chang. Biol.* **19**, 2932–2939. (doi:10.1111/gcb.12257)
- 667 82. Nadeau CP, Urban MC, Bridle JR. 2017 Coarse climate change projections for species  
668 living in a fine-scaled world. *Glob. Chang. Biol.* **23**, 12–24. (doi:10.1111/gcb.13475)
- 669 83. Bakken GS. 1992 Measurement and Application of Operative and Standard Operative  
670 Temperatures in Ecology. *Am. Zool.* **32**, 194–216. (doi:10.1093/icb/32.2.194)
- 671 84. Tieleman BI, Van Noordwijk HJ, Williams JB. 2008 Nest site selection in a hot desert:  
672 trade-off between microclimate and predation risk. *Condor* **110**, 116–124.  
673 (doi:10.1525/cond.2008.110.1.116)
- 674 85. Fick SE, Hijmans RJ. 2017 WorldClim 2: new 1-km spatial resolution climate surfaces for  
675 global land areas. *Int. J. Climatol.* **37**, 4302–4315. (doi:10.1002/joc.5086)
- 676 86. Pincebourde S, Casas J. 2015 Warming tolerance across insect ontogeny: influence of  
677 joint shifts in microclimates and thermal limits. *Ecology* **96**, 986–997. (doi:10.1890/14-  
678 0744.1)
- 679 87. Bramer I *et al.* 2018 Advances in Monitoring and Modelling Climate at Ecologically  
680 Relevant Scales. In *Next Generation Biomonitoring: Part 1*, pp. 101–161.  
681 (doi:10.1016/bs.aecr.2017.12.005)  
682

683 **Acknowledgements**

684 We sincerely thank the 2019 East Bay and Alert field teams for their assistance. We are grateful  
685 to Dr. Christina Semeniuk for the use of spectrophotometer measurement equipment and to  
686 Kevyn Gammie-Janisse and Chris Harris for their assistance with spectrophotometer  
687 measurements and analysis. We are also indebted to Lincoln Savi for providing essential help  
688 with the 3D models.

689

690 **Funding**

691 O.P.L. is supported by an NSERC Discovery Grant (06724/05507), Canada Research Chairs  
692 (34387) and Polar Knowledge (622-18/648-19). F.V. is supported by an NSERC Discovery  
693 Grant (05244/05628), F.V., K.H.E. and A.L.H. are supported by a FRQNT Team Grant  
694 (253477). F.V. and D.B. received financial and logistical support from the Department of  
695 National Defence of Canada. C.J.C and the Alert radiation station receive support from the  
696 NOAA Arctic Research Program.

697

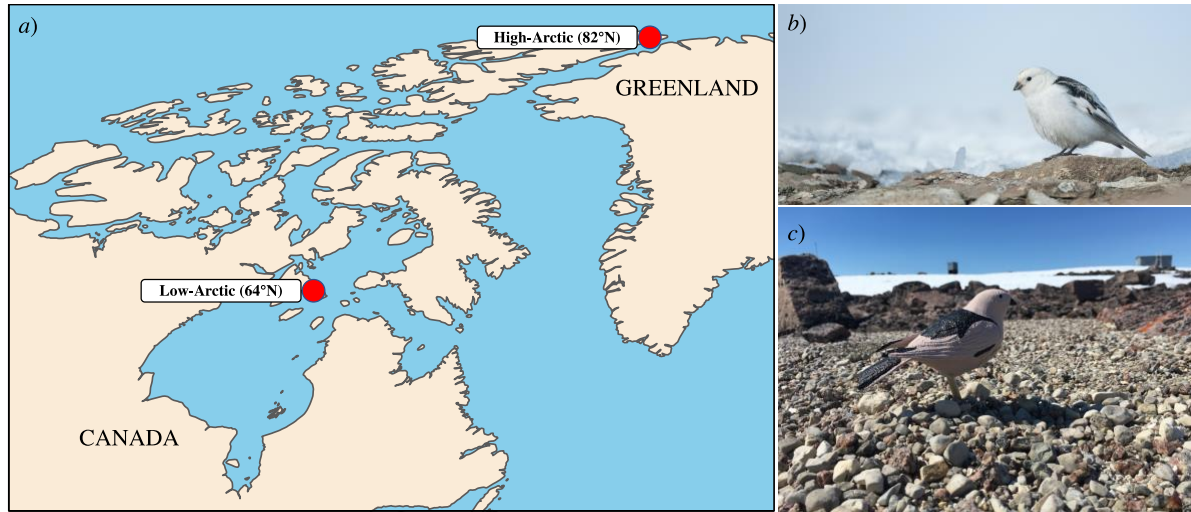

698

699 Figure 1. *a*) The location of the low-Arctic (East Bay Island, 64°N) and high-Arctic (Alert,  
700 82°N) study sites. *b*) Photo of a snow bunting at the high-Arctic study site. *c*) Photo of a 3D  
701 printed snow bunting model in the field at the low-Arctic study site.

702

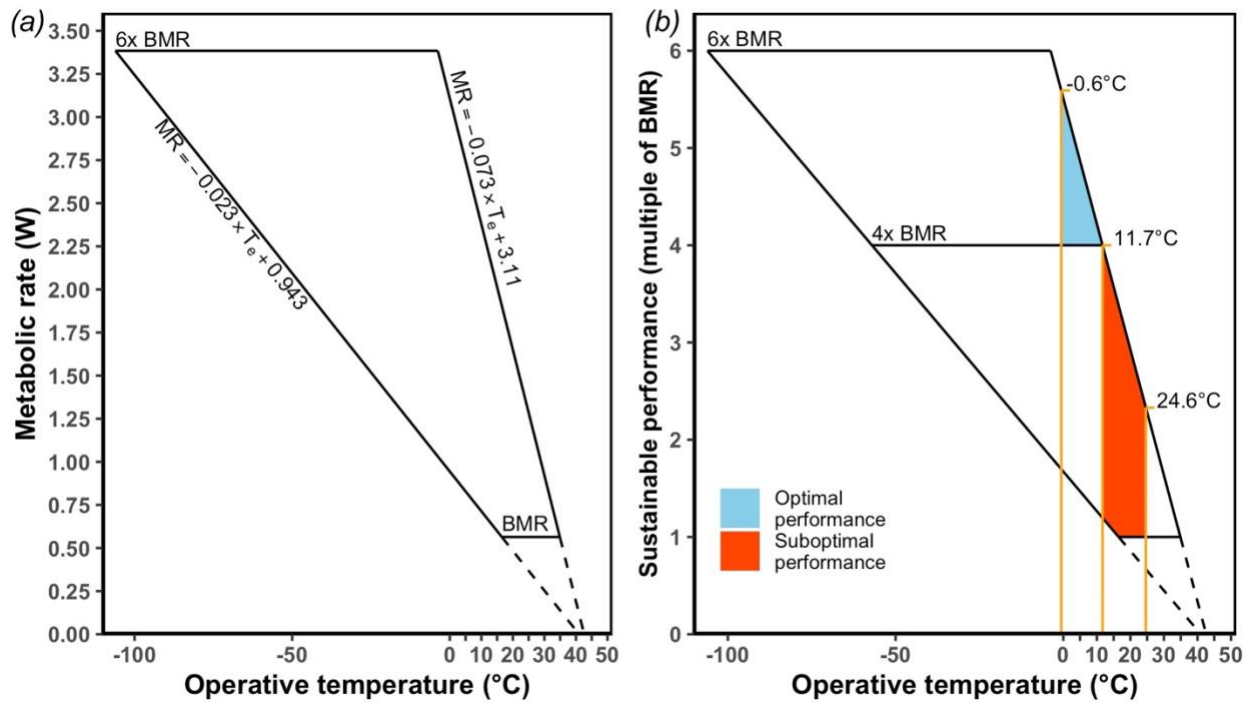

703

704 **Figure 2.** (a) Snow bunting thermoregulatory polygon bounded by basal metabolic rate (BMR;  
705 0.564 W), minimum wet thermal conductance (0.023 W/°C), maximum dry thermal conductance  
706 (0.073 W/°C), and maximal sustained metabolic rate estimated at 6x BMR in breeding buntings.  
707 (b) Sustainable performance (expressed as a multiple of BMR) possible for buntings under  
708 thermal balance. At operative temperatures below 11.7°C, buntings can maintain thermal balance  
709 and sustain optimal performance (i.e., performance  $\geq$  4x BMR; blue zone). As operative  
710 temperatures increase, buntings must reduce activity, and concomitantly metabolic rate, to  
711 maintain thermal balance, resulting in a suboptimal performance (i.e., performance  $<$  4x BMR;  
712 red zone). Optimal performance is defined as the sustained level of work required by adults to  
713 sufficiently rear nestlings. The black dashed lines are the extrapolation of the minimum and  
714 maximum thermal conductance slopes to the average body temperature recorded during  
715 laboratory measurements. The -0.6°C and 24.6°C temperatures on the right side of the polygon  
716 in (b) represent the average hourly operative temperature range measured in the field during  
717 snow buntings' peak provisioning period.

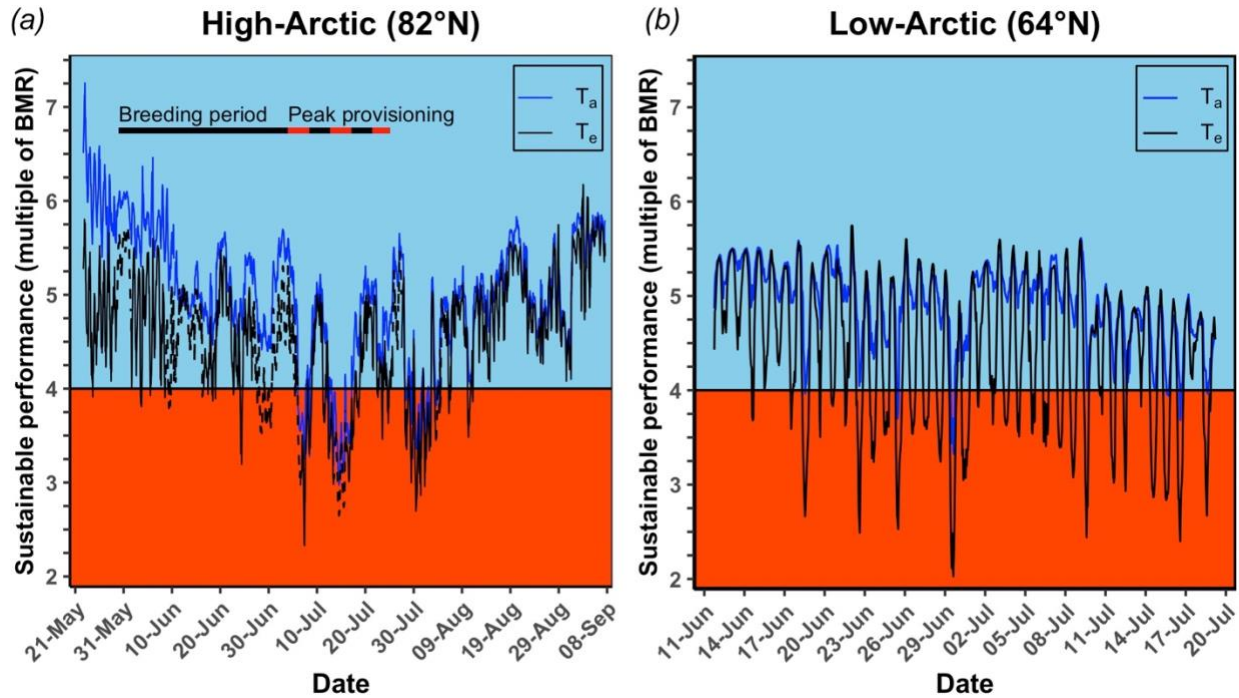

718

719 **Figure 3.** Estimated sustainable performance possible for snow buntings maintaining thermal  
720 balance at a (a) high-Arctic (Alert, Nunavut Canada) and (b) low-Arctic (East Bay Island,  
721 Nunavut Canada) breeding site. The line dividing blue and red zones represents the 4-times basal  
722 metabolic rate (BMR) minimum required for adults to maintain adequate provisioning to  
723 growing nestlings (see methods for details). The blue zone represents the times when average  
724 hourly operative ( $T_e$ ) or air ( $T_a$ ) temperature was below the thermoregulatory polygon threshold  
725 temperature of 11.7°C, predicting that buntings could sustain performance levels  $\geq$  4-times basal  
726 metabolic rate without altering behaviour. The red zone represents the times when  $T_e$  or  $T_a$   
727 exceeded 11.7°C, predicting that buntings would be required to reduce their provisioning  
728 behaviour to subsequently work below 4-times basal metabolic rate to limit heat production and  
729 avoid lethal body temperatures. The dashed black lines in panel a represent the predicted  $T_e$   
730 values from the artificial neural network (see methods for details).

731

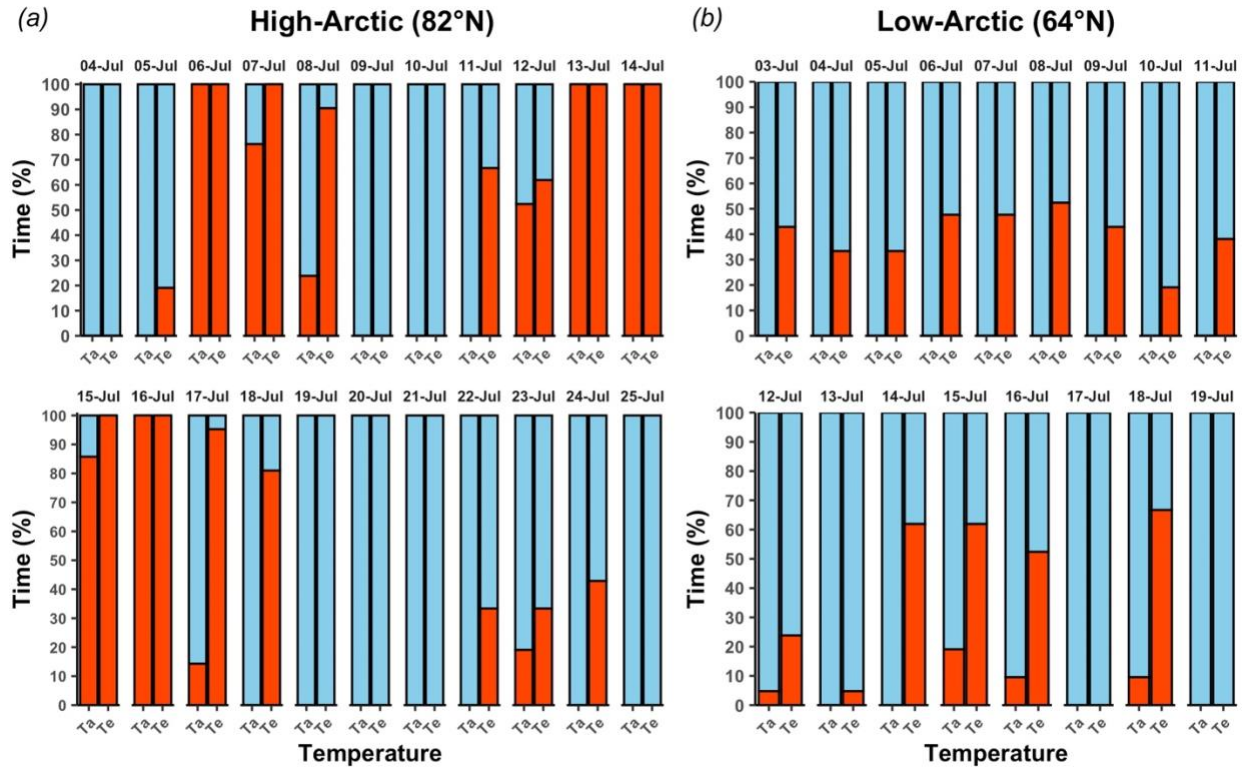

732

733 **Figure 4.** The daily percentage of time during their active period (01:00 hrs to 22:00 hrs) when  
734 snow buntings at a (a) high-Arctic (Alert, Nunavut Canada) and (b) low-Arctic (East Bay Island,  
735 Nunavut Canada) breeding site could either sustain an optimal performance level (blue region) or  
736 forced to work at suboptimal performance levels (red zones) based on either operative ( $T_e$ ) or air  
737 ( $T_a$ ) temperature recordings. Optimal and suboptimal performance is defined as the periods when  
738 buntings could sustain levels of work  $\geq 4$ -times basal metabolic rate or  $< 4$ -times basal metabolic  
739 rate, respectively, while maintaining thermal balance under a given heat load.
